# Supplementary material
Source: PubMed Central journal article supplement (PMC3956179)
Supplement: 1322778111_pnas.201322778SI.pdf [file 1322778111_pnas.201322778SI.pdf]

# Supporting Information

Kleinboelting et al. 10.1073/pnas.1322778111

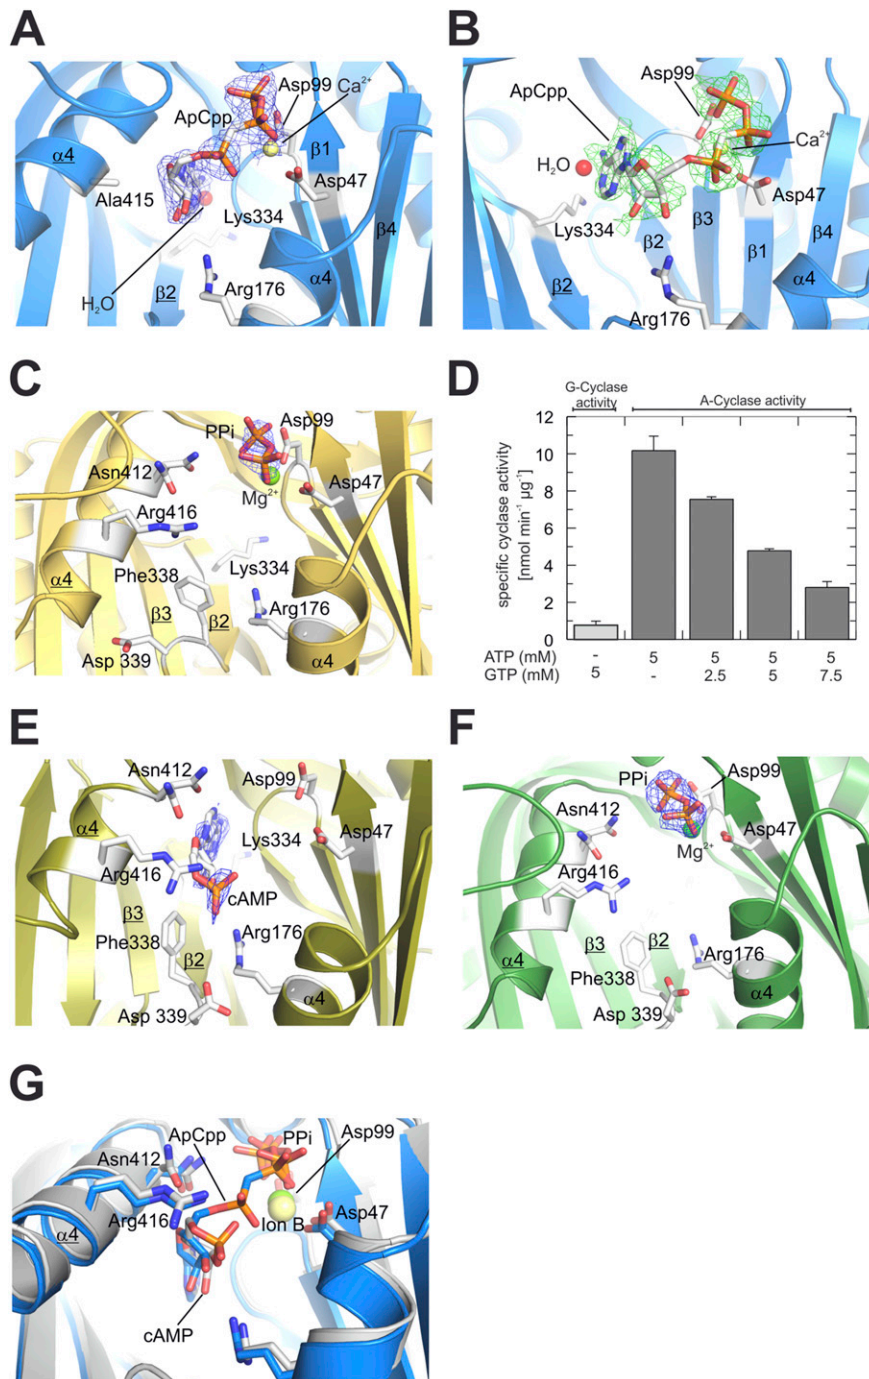

**Fig. S1.** Crystal structures of soluble adenylyl cyclase (sAC) catalytic domains (sAC-cat) complexes with  $\alpha,\beta$ -methylene-ATP (ApCpp) and products. (A) sAC-cat active site with the ATP analog colored according to atom type and overlaid with  $2F_o-F_c$  density contoured at  $1\sigma$ . (B) sAC-cat active site with the ATP analog and  $Ca^{2+}$  colored according to atom type and overlaid with  $F_o-F_c$  omit density contoured at  $2\sigma$ . (C) sAC-cat active site after reaction with ATP and  $Mg^{2+}$  resulting in pyrophosphate (PP<sub>i</sub>) density, with the ligand colored according to atom type and overlaid with  $2F_o-F_c$  density contoured at  $1\sigma$ . (D) sAC-cat guanylyl cyclase (GC) activity (light gray) and its AC activity at a constant ATP concentration in the presence of increasing amounts of GTP (gray). Error bars indicate SD ( $n = 2$ ). (E) sAC-cat active site soaked with cAMP, with the ligand colored according to atom type and overlaid with  $2F_o-F_c$  density contoured at  $1\sigma$ . (F) sAC-cat active site soaked with PP<sub>i</sub>, with the ligand colored according to atom type and overlaid with  $2F_o-F_c$  density contoured at  $1\sigma$ . (G) Overlay of the active sites of sAC-cat soaked with both products cAMP and PP<sub>i</sub> (gray) and of the sAC-cat/ApCpp complex (blue), with relevant residues shown in stick presentation.

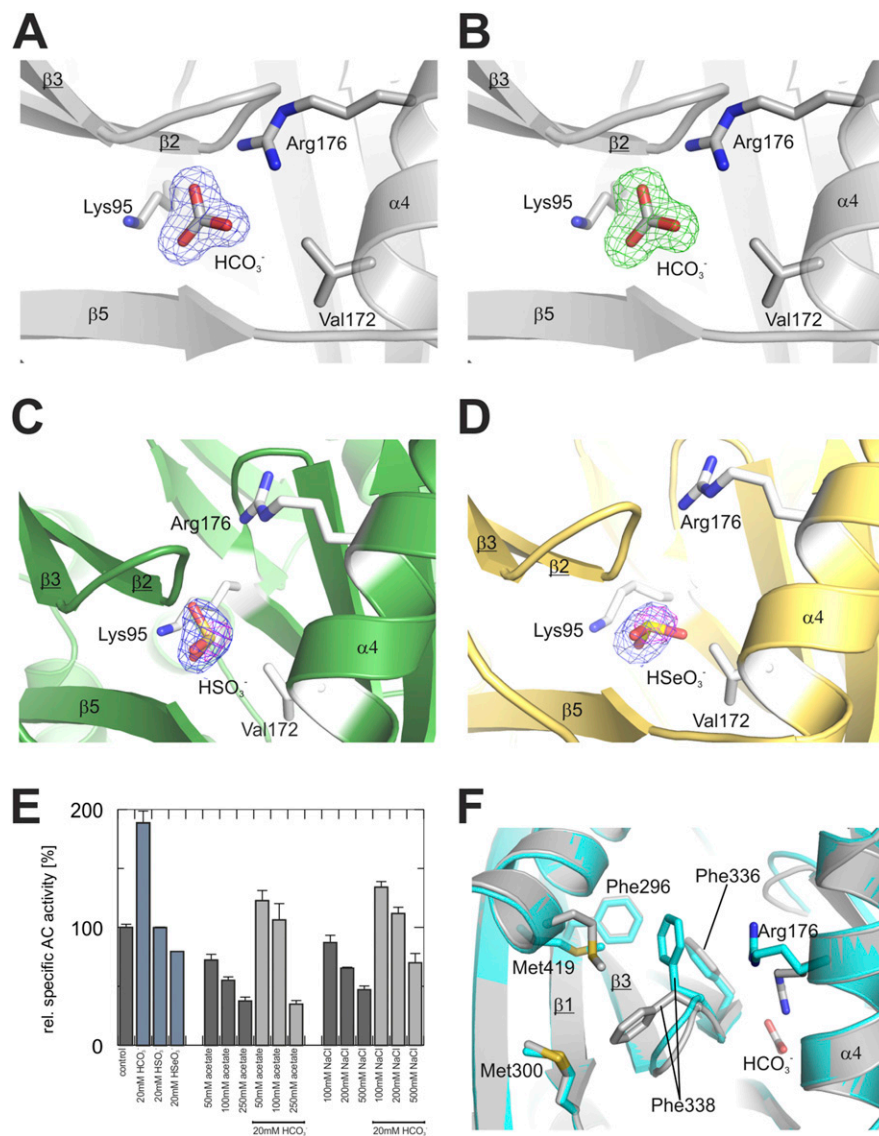

**Fig. S2.** Crystal structures of apo sAC-cat soaked with bicarbonate ( $\text{HCO}_3^-$ ) and related anions. (A)  $\text{HCO}_3^-$  binding site in sAC-cat apo, with  $2F_o - F_c$  density for the ligand contoured at  $1\sigma$ . The closest residues are shown as sticks. (B) Regulatory site in sAC-cat soaked with  $\text{HCO}_3^-$ , with  $F_o - F_c$  omit density for the ligand contoured at  $3\sigma$ . (C)  $\text{HSeO}_3^-$  bound to sAC-cat with  $2F_o - F_c$  density (blue) for the ligand contoured at  $1\sigma$  and the anomalous scattering signal (magenta) at  $4\sigma$ .  $\text{HSeO}_3^-$  is colored according to atom type. (D)  $\text{HSeO}_3^-$  bound to sAC-cat (ligand colored according to atom type), with  $2F_o - F_c$  density (blue) for the  $\text{HSeO}_3^-$  contoured at  $1\sigma$  and the anomalous scattering signal (magenta) at  $3\sigma$ . (E) Influence of  $\text{HCO}_3^-$ ,  $\text{HSO}_3^-$ , and  $\text{HSeO}_3^-$  on sAC activity. Acetate and chloride ions at high concentrations inhibit basal and stimulated sAC activity. Error bars indicate SD ( $n = 2$ ). rel., relative. (F) Overlay of active site regions of apo sAC (cyan) and the sAC/bicarbonate complex (gray) shows the movement of Phe338.

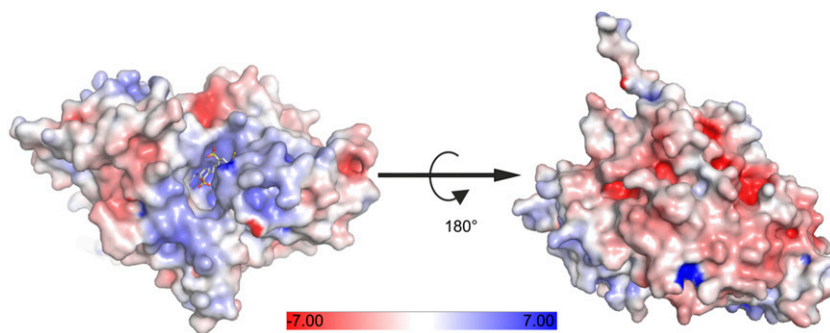

**Fig. S3.** Electrostatic potential of the sAC surface. Electrostatic potential color-coded on the front (*Left*) and back (*Right*) of the sAC surface shows the negatively charged backside and the positive potential at the active site entrance. The 4,4'-diisothiocyanatostilbene-2,2'-disulfonic acid (DIDS) is shown in sticks and colored according to atom type.

**Table S1.** Diffraction data, phasing, and refinement statistics

| sAC-cat complex                                            | apo                           | apo,<br>thiomersal soak       | ApCpp                          | apo,<br>bicarbonate soak      | apo,<br>biselenite soak        |
|------------------------------------------------------------|-------------------------------|-------------------------------|--------------------------------|-------------------------------|--------------------------------|
| PDB code                                                   | 4CLF                          |                               | 4CLK                           | 4CLL                          | 4CLY                           |
| Space group                                                | P6 <sub>3</sub>               | P6 <sub>3</sub>               | P6 <sub>3</sub>                | P6 <sub>3</sub>               | P6 <sub>3</sub>                |
| Unit cell constants                                        | a = b = 99.7 Å,<br>c = 97.9 Å | a = b = 99.7 Å,<br>c = 98.1 Å | a = b = 100.3 Å,<br>c = 97.5 Å | a = b = 99.8 Å,<br>c = 98.1 Å | a = b = 100.2 Å,<br>c = 97.5 Å |
| Resolution                                                 | 44.45–1.70 Å                  | 86.57–1.80 Å                  | 48.77–2.20 Å                   | 49.03–1.70 Å                  | 48.79–2.05 Å                   |
| Unique reflections*                                        | 60,638 (5,058)                | 101,373 (8,047) <sup>†</sup>  | 28,304 (1,852)                 | 60,918 (5,089)                | 68,658 (13,047) <sup>†</sup>   |
| <I/σ(I)>                                                   | 14.9 (1.9)                    | 13.5 (2.5)                    | 10.6 (1.7)                     | 10.8 (2.4)                    | 18.4 (4.2)                     |
| Completeness                                               | 100% (100%)                   | 100% (100%)                   | 100% (100%)                    | 100% (100%)                   | 100% (100%)                    |
| R <sub>meas</sub> <sup>‡</sup>                             | 7.4% (94.3%)                  | 7.5% (55.1%)                  | 17.0% (117.9%)                 | 10.8% (69.1%)                 | 9.0% (58.6%)                   |
| Heavy atom sites                                           | —                             | 2                             | —                              | —                             | 1                              |
| BAYES CC                                                   | —                             | 31.5%                         | —                              | —                             | —                              |
| FOM                                                        | —                             | 0.35                          | —                              | —                             | —                              |
| Refinement resolution                                      | 1.70 Å                        |                               | 2.20 Å                         | 1.70 Å                        | 2.05 Å                         |
| Reflections used for refinement                            | 57,557                        |                               | 26,864                         | 57,822                        | 33,106                         |
| Protein atoms                                              | 3,740                         |                               | 3,662                          | 3,751                         | 3,714                          |
| Solvent atoms                                              | 286                           |                               | 168                            | 319                           | 263                            |
| Ligand atoms                                               | 10                            |                               | 53                             | 72                            | 29                             |
| rmsd                                                       |                               |                               |                                |                               |                                |
| Bond lengths                                               | 0.019 Å                       |                               | 0.019 Å                        | 0.019 Å                       | 0.019 Å                        |
| Bond angles                                                | 2.0°                          |                               | 2.0°                           | 1.7°                          | 2.0°                           |
| Average B-factor                                           | 29.0 Å <sup>2</sup>           |                               | 35.0 Å <sup>2</sup>            | 23.5 Å <sup>2</sup>           | 38.6 Å <sup>2</sup>            |
| Final R <sub>cryst</sub> /R <sub>free</sub> <sup>§,¶</sup> | 16.5%/20.5%                   |                               | 17.6%/23.6%                    | 16.2%/19.8%                   | 15.7%/19.7%                    |

ApCpp, α,β-methylene-ATP; BAYES CC, Bayesian correlation coefficient; FOM, figure of merit; PDB, Protein Data Bank; R<sub>cryst</sub>, residual factor for diffraction data used in crystallographic refinement; R<sub>free</sub>, residual factor for diffraction data omitted from crystallographic refinement; R<sub>meas</sub>, residual factor for individual measurements; sAC-cat, soluble adenylyl cyclase catalytic domains.

\*Numbers in parentheses are for the outermost shell.

<sup>†</sup>Data with anomalous signal, Bijvoet-related reflections not merged.

$$R_{\text{meas}} = \frac{\sum_h \sqrt{\frac{nh}{nh-1}} \sum_i^{nh} |\hat{I}_h - I_{h,i}|}{\sum_h \sum_i^{nh} I_{h,i}}, \text{ with } \hat{I}_h = \frac{1}{nh} \sum_i^{nh} I_{h,i}.$$

$$R\text{-factor} = \frac{\sum |F_{\text{obs}} - k|F_{\text{calc}}|}{\sum |F_{\text{obs}}|}, \text{ where } |F_{\text{obs}}| \text{ is the observed and } |F_{\text{calc}}| \text{ the calculated structure factor amplitude.}$$

<sup>¶</sup>R<sub>free</sub> was calculated from 5% of measured reflections omitted from refinement.

Table S2. Diffraction data and refinement statistics

| sAC-cat complex                                            | ApCpp,<br>bisulfite soak       | apo,<br>bisulfite soak         | apo,<br>ATP/Mg <sup>2+</sup> soak | apo,<br>cAMP soak              | apo,<br>cAMP/PP <sub>i</sub> soak |
|------------------------------------------------------------|--------------------------------|--------------------------------|-----------------------------------|--------------------------------|-----------------------------------|
| PDB code                                                   | 4CLW                           | 4CM2                           | 4CLU                              | 4CLP                           | 4CLT                              |
| Space group                                                | P6 <sub>3</sub>                | P6 <sub>3</sub>                | P6 <sub>3</sub>                   | P6 <sub>3</sub>                | P6 <sub>3</sub>                   |
| Unit cell constants                                        | a = b = 100.6 Å,<br>c = 97.2 Å | a = b = 100.2 Å,<br>c = 97.7 Å | a = b = 100.7 Å,<br>c = 97.3 Å    | a = b = 100.6 Å,<br>c = 97.1 Å | a = b = 99.8 Å,<br>c = 98.1 Å     |
| Resolution                                                 | 87.10–2.15 Å                   | 86.73–1.80 Å                   | 87.21–1.90 Å                      | 87.11–1.90 Å                   | 87.44–1.95 Å                      |
| Unique reflections*                                        | 58,807 (3,829) <sup>†</sup>    | 101,606 (7,993) <sup>†</sup>   | 44,046 (3,269)                    | 43,918 (3,242)                 | 40,997 (2,970)                    |
| <I/σ(I)>                                                   | 20.3 (4.8)                     | 19.7 (2.5)                     | 13.4 (2.5)                        | 13.5 (2.0)                     | 11.3 (2.1)                        |
| Completeness                                               | 98% (97%)                      | 100% (99%)                     | 100% (100%)                       | 100% (100%)                    | 100% (100%)                       |
| R <sub>meas</sub> <sup>‡</sup>                             | 7.2% (50.8%)                   | 7.8% (75.5%)                   | 9.0% (75.7%)                      | 9.6% (89.8%)                   | 10.3% (72.2%)                     |
| Refinement resolution                                      | 2.15 Å                         | 1.80 Å                         | 1.90 Å                            | 1.90 Å                         | 1.95 Å                            |
| Reflections used for refinement                            | 28,395                         | 48,894                         | 41,832                            | 41,710                         | 38,932                            |
| Protein atoms                                              | 3,638                          | 3,757                          | 3,684                             | 3,678                          | 3,673                             |
| Solvent atoms                                              | 147                            | 244                            | 202                               | 209                            | 106                               |
| Ligand atoms                                               | 66                             | 31                             | 39                                | 92                             | 60                                |
| rmsd                                                       |                                |                                |                                   |                                |                                   |
| Bond lengths                                               | 0.019 Å                        | 0.019 Å                        | 0.019 Å                           | 0.019 Å                        | 0.019 Å                           |
| Bond angles                                                | 2.0°                           | 2.0°                           | 2.0°                              | 2.0°                           | 2.0°                              |
| Average B-factor                                           | 48.4 Å <sup>2</sup>            | 30.0 Å <sup>2</sup>            | 34.6 Å <sup>2</sup>               | 35.6 Å <sup>2</sup>            | 31.8 Å <sup>2</sup>               |
| Final R <sub>cryst</sub> /R <sub>free</sub> <sup>§,¶</sup> | 16.2%/20.3%                    | 16.2%/20.5%                    | 16.0%/20.5%                       | 16.1%/20.7%                    | 17.3%/22.0%                       |

PP<sub>i</sub>, pyrophosphate.

\*Numbers in parentheses are for the outermost shell.

<sup>†</sup>Data with anomalous signal, Bijvoet-related reflections not merged.

$$^{\ddagger}R_{\text{meas}} = \frac{\sum_h \sqrt{\frac{nh}{nh-1}} \sum_i^{nh} |I_h - I_{h,i}|}{\sum_h \sum_i^{nh} I_{h,i}}, \text{ with } I_h = \frac{1}{nh} \sum_i^{nh} I_{h,i}.$$

$$^{\S}R\text{-factor} = \frac{\sum |F_{\text{obs}}| - k|F_{\text{calc}}|}{\sum |F_{\text{obs}}|}, |F_{\text{obs}}| \text{ is the observed and } |F_{\text{calc}}| \text{ the calculated structure factor amplitude.}$$

<sup>¶</sup>R<sub>free</sub> was calculated from 5% of measured reflections omitted from refinement.

**Table S3. Diffraction data and refinement statistics**

| sAC-cat complex                                            | apo, DIDS                   | apo, PP <sub>i</sub> soak   | ApCpP, bicarbonate soak           |
|------------------------------------------------------------|-----------------------------|-----------------------------|-----------------------------------|
| PDB code                                                   | 4CLZ                        | 4CLS                        | 4CM0                              |
| Space group                                                | P6 <sub>3</sub>             | P6 <sub>3</sub>             | P6 <sub>3</sub>                   |
| Unit cell constants                                        | a = b = 100.5 Å, c = 97.4 Å | a = b = 100.9 Å, c = 97.6 Å | a = b = 100.2 Å, c = 95.3 Å       |
| Resolution                                                 | 87.04–1.90 Å                | 86.68–1.85 Å                | 88.50–3.20 Å                      |
| Unique reflections*                                        | 85,010 (6,250) <sup>†</sup> | 47,385 (3,628)              | 9,419 (431)                       |
| <I/σ(I)>                                                   | 13.6 (2.4)                  | 9.0 (1.58)                  | 17.0 (2.7)                        |
| Completeness                                               | 100% (100%)                 | 100% (100%)                 | 100% (100%)                       |
| R <sub>meas</sub> <sup>‡</sup>                             | 8.8% (73.8%)                | 10.4% (88.7%)               | 12.1% (87.2%)                     |
| Refinement resolution                                      | 1.90 Å                      | 1.85 Å                      | 3.20 Å                            |
| Reflections used for refinement                            | 41,806                      | 45,014                      | 8,952                             |
| Protein atoms                                              | 3,692                       | 3,665                       | 3,613                             |
| Solvent atoms                                              | 283                         | 162                         | —                                 |
| Ligand atoms                                               | 141                         | 29                          | 33                                |
| rmsd                                                       |                             |                             |                                   |
| Bond lengths                                               | 0.019 Å                     | 0.019 Å                     | 0.019 Å                           |
| Bond angles                                                | 2.0°                        | 2.0°                        | 2.0°                              |
| Average B-factor                                           | 32.8 Å <sup>2</sup>         | 35.6 Å <sup>2</sup>         | 61.7 Å <sup>2</sup> <sup>  </sup> |
| Final R <sub>crist</sub> /R <sub>free</sub> <sup>§,¶</sup> | 16.1%/20.0%                 | 17.4%/21.4%                 | 25.0%/29.0%                       |

DIDS, 4,4'-diisothiocyanatostilbene-2,2'-disulfonic acid.

\*Numbers in parentheses are for the outermost shell.

<sup>†</sup>Data with anomalous signal, Bijvoet-related reflections not merged.

$$^{\dagger}R_{\text{meas}} = \frac{\sum_h \sqrt{\frac{nh}{nh-1}} \sum_i^{nh} |\hat{I}_h - I_{h,i}|}{\sum_h \sum_i^{nh} I_{h,i}}, \text{ with } \hat{I}_h = \frac{1}{nh} \sum_i^{nh} I_{h,i}.$$

$$^{\S}R\text{-factor} = \frac{\sum_k ||F_{\text{obs}}| - k|F_{\text{calc}}||}{\sum_k |F_{\text{obs}}|}, |F_{\text{obs}}| \text{ is the observed and } |F_{\text{calc}}| \text{ the calculated structure factor amplitude.}$$

<sup>¶</sup>R<sub>free</sub> was calculated from 5% of measured reflections omitted from refinement.

<sup>||</sup>Refinement with overall temperature factor.
